# Supplementary material for: Online capillary electrophoresis – mass spectrometry analysis of histatin-5 and its degradation products
Source: Royal Society of Chemistry journal article supplement (doi:10.1039/d0an00756k), 2020-01-01
Supplement: d0an00756k1.pdf [file d0an00756k1.pdf]

## SUPPORTING INFORMATION

### **Online capillary electrophoresis – mass spectrometry analysis of histatin-5 and its degradation products**

Jared Lamp<sup>†</sup>, Svetlana P. Ikononova<sup>‡</sup>, Amy J. Karlsson<sup>‡</sup>, Qiangwei Xia<sup>†</sup>, Yan Wang<sup>§<sup>Δ</sup>\*</sup>

<sup>†</sup> CMP Scientific, Corp., 760 Parkside Ave, STE 211, Brooklyn, NY 11226, United States

<sup>‡</sup> Department of Chemical and Biomolecular Engineering, University of Maryland, College Park, MD

<sup>§</sup> Proteomics Core Facility, University of Maryland, College Park, MD

<sup>Δ</sup> NIH/NIDCR, Bldg 30, Rm 320, 30 Convent Drive MSC 4370, Bethesda, MD 20892-4370

\*Correspondence to Dr. Yan Wang at [yan.wang2@nih.gov](mailto:yan.wang2@nih.gov)

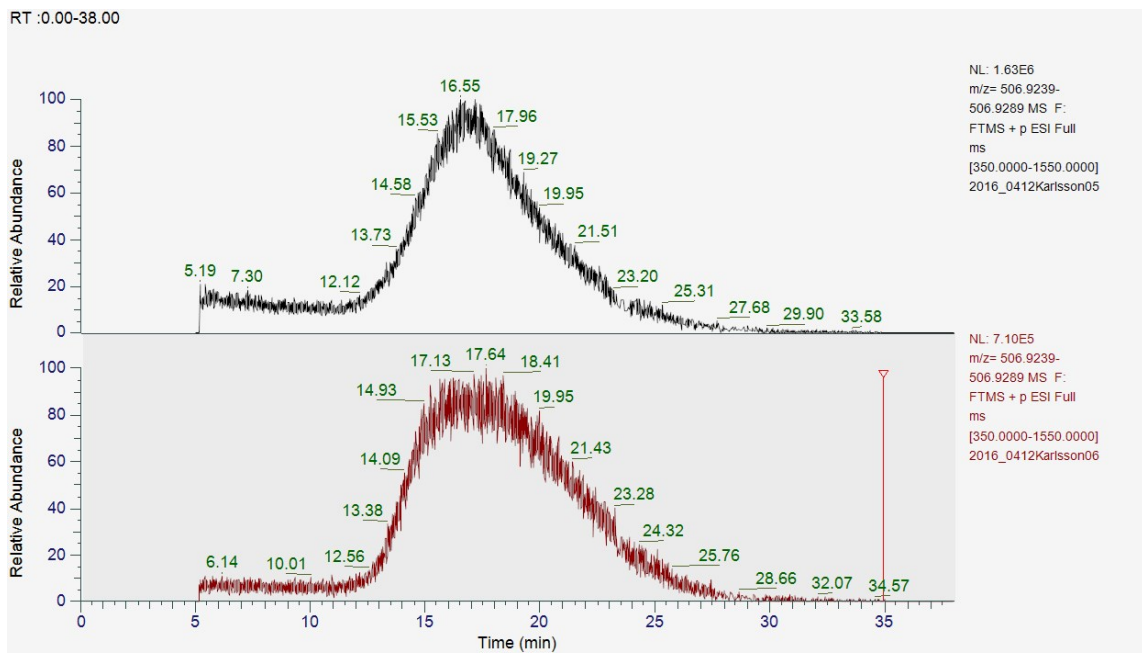

**Figure S-1:** Chromatograms of Hst-5 C3 poroshell, 1.0 x 150 mm 50  $\mu$ L/min. (Top) The extracted ion chromatogram of the Hst-5 +6 shows a broad elution over 15 min. (Bottom) The extracted ion chromatogram of the Hst-5 +6 showing carryover during a blank injection following the injection from the top figure.

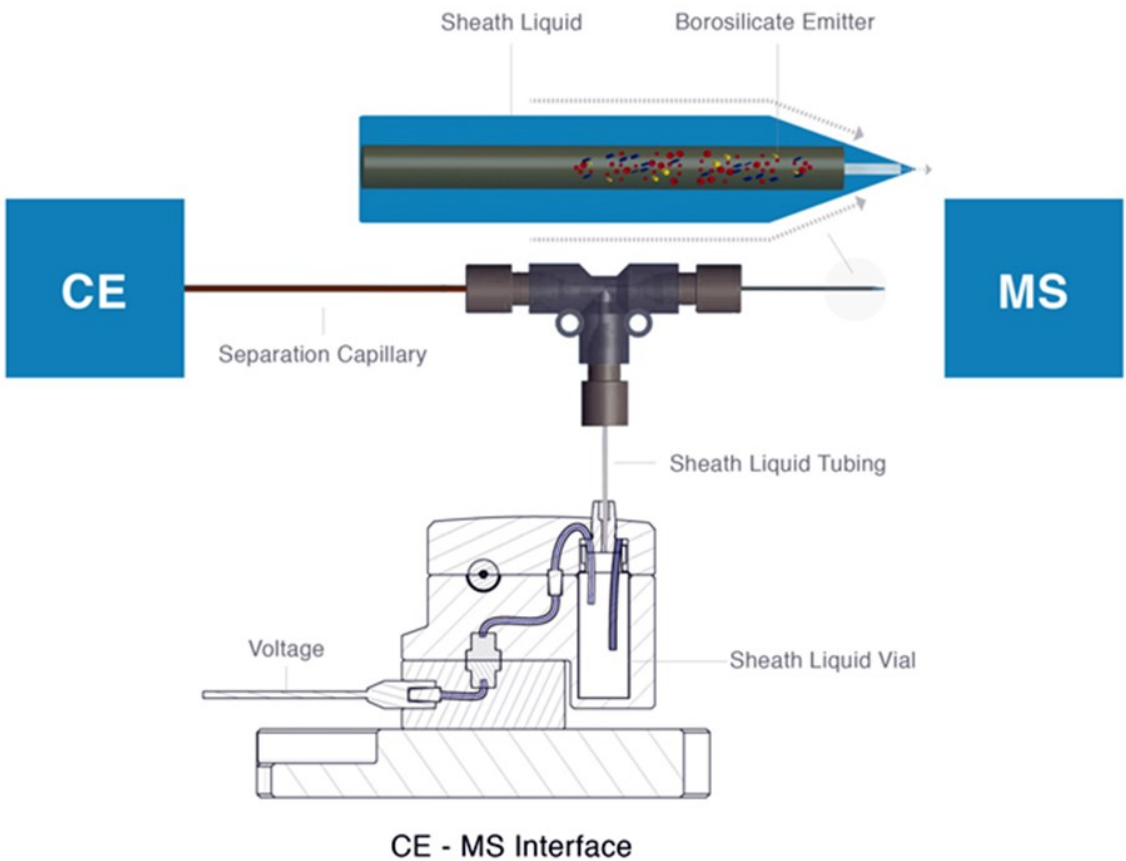

**Figure S-2:** Schematic representation of the CE-MS interface. Analyte travels through the separation capillary under high voltage before exiting into the electrospray emitter. An external voltage applied to the connected sheath liquid vial creates EOF within the emitter, entraining analytes into the mass spectrometer.
